# Host evolutionary history and ecology shape virome composition in fishes

Jemma L. Geoghegan<sup>1,2,3</sup>, Francesca Di Giallonardo<sup>4</sup>, Michelle Wille<sup>5</sup>, Ayda Susana Ortiz-Baez<sup>6</sup>,  
Vincenzo A. Costa<sup>2</sup>, Timothy Ghaly<sup>2</sup>, Jonathon C. O. Mifsud<sup>2</sup>, Olivia M. H. Turnbull<sup>2</sup>, David R.  
Bellwood<sup>7</sup>, Jane E. Williamson<sup>2</sup>, Edward C. Holmes<sup>6</sup>

<sup>1</sup>Department of Microbiology and Immunology, University of Otago, Dunedin 9016, New Zealand.

<sup>2</sup>Department of Biological Sciences, Macquarie University, Sydney, NSW 2109, Australia.

<sup>3</sup>Institute of Environmental Science and Research, Wellington 5018, New Zealand.

<sup>4</sup>The Kirby Institute, University of New South Wales, Sydney, NSW 2052, Australia.

<sup>5</sup>WHO Collaborating Centre for Reference and Research on Influenza, The Peter Doherty Institute  
for Infection and Immunity, Melbourne, VIC, Australia.

<sup>6</sup>Marie Bashir Institute for Infectious Diseases and Biosecurity, School of Life and Environmental  
Sciences and School of Medical Sciences, The University of Sydney, Sydney, NSW 2006, Australia.

<sup>7</sup>ARC Centre of Excellence for Coral Reef Studies and College of Science and Engineering, James  
Cook University, Townsville, QLD 4811, Australia.

Author for correspondence:

Jemma L. Geoghegan

[jemma.geoghegan@otago.ac.nz](mailto:jemma.geoghegan@otago.ac.nz)

Keywords: fish, virome, virus evolution, metagenomics, host-jumping

## 27 Abstract

28 Identifying the components of host ecology that promote virus diversity is crucial for our  
29 understanding of the drivers of virus evolution and disease emergence. As the most species-rich  
30 group of vertebrates that exhibit diverse ecologies, fish provide an ideal model system to study the  
31 impacts of host ecology on the composition of their viromes. To better understand the factors that  
32 shape virome composition in marine fishes, we characterised the viromes of 23 fish species (19 from  
33 this study and four that were sampled previously (Geoghegan et al 2018a)) using unbiased bulk  
34 RNA-sequencing (meta-transcriptomics) together with both sequence and protein structural  
35 homology searches to identify divergent viruses that often evade characterisation. These data  
36 revealed that fish virome composition – that is, viral richness, abundance and diversity – were  
37 predominantly shaped by the phylogenetic history of their hosts, as reflected in taxonomic order. In  
38 addition, preferred mean water temperature, climate, habitat depth, community diversity and  
39 whether fish swim in schools or are solitary were identified as important ecological features that  
40 shaped virome diversity and abundance in these fish. Our analysis also identified 25 new virus  
41 transcripts that could be assigned to 11 different viral families, including the first fish virus in the  
42 *Matonaviridae*. Other viruses identified fell within the *Astroviridae*, *Picornaviridae*, *Arenaviridae*,  
43 *Reoviridae*, *Hepadnaviridae*, *Paramyxoviridae*, *Rhabdoviridae*, *Hantaviridae*, *Filoviridae* and  
44 *Flaviviridae*. Our results provide a better understanding of the ecological determinants of virome  
45 diversity and support the view that fish harbour a multitude of viruses, of which the vast majority  
46 are undescribed.

## 47 Introduction

48 Metagenomic next-generation sequencing (mNGS) has led to a revolution in virus discovery (Shi et  
49 al 2018b, Zhang et al 2018), exposing more of the diversity, abundance and structure of the  
50 eukaryotic virosphere. However, while it is now potentially possible to reveal entire host viromes  
51 (Chang et al 2019, Geoghegan et al 2018a, Geoghegan et al 2018b, Paez-Espino et al 2016,  
52 Pettersson et al 2019, Porter et al 2019, Shi et al 2016, Shi et al 2018a, Tirosh et al 2018), we do not  
53 fully understand the factors that shape virome diversity, including the dual and interacting impact  
54 of host and virus ecology. Indeed, until recently, the study of virus ecology had largely been limited  
55 to studies of single viruses and/or single hosts and their interactions, restricting our ability to  
56 explore multifactorial impacts, including diverse aspects of host ecology, on virome diversity.  
57 Fortunately, the advent of unbiased, meta-transcriptomic RNA sequencing enables us to explore,  
58 more thoroughly, virome diversity and abundance as well as the myriad of biological and  
59 environmental factors that likely shape this diversity (Wille et al 2019, Wille 2020). Identifying the  
60 host ecological factors that promote virus diversification is also central to understanding the drivers  
61 of virus evolution and emergence. As a simple case in point, host behavioural ecology directly  
62 affects contact rates among hosts and is therefore likely to be important in shaping viral dynamics:  
63 more frequent intra- and inter-host contacts are likely to increase the potential for viral spread and  
64 diversification.

65 The marine environment is a rich source of viruses. It has long been known that the bacteriophage  
66 present in aquatic ecosystems outnumber that of other lifeforms 10-fold (Maranger and Bird 1995),  
67 with an estimated concentration of 10 billion virus particles per litre of surface water (Bergh et al  
68 1989, Breitbart and Rohwer 2005, Middelboe and Brussaard 2017, Suttle 2005), although  
69 abundance levels vary with such factors as ocean depth (De Corte et al 2012, Lara et al 2017),  
70 temperature (Coutinho et al 2017), latitude (Gregory et al 2019) and phytoplankton bloom  
71 development (Alarcon-Schumacher et al 2019). In contrast to bacteriophage, little is known about  
72 how such environmental factors might contribute to virus diversity in natural aquatic vertebrate  
73 host populations, even though viruses can cause large-scale infection and disease in farmed fish  
74 (Crane and Hyatt 2011, Jarungsriapisit et al 2020, Whittington and Reddacliff 1995).

75 Fish provide an ideal model to understand how host ecology might shape the composition and  
76 abundance of those viruses that infect them. Fish are the most species-rich group of vertebrates  
77 with over 33,000 species described to date (fishbase.org), the vast majority of which (~85%) are  
78 bony fish (the Osteichthyes) (Betancur-R et al 2017). Bony fish themselves are an extremely diverse  
79 and abundant group comprising 45 taxonomic orders. As such, these animals exhibit a wide range

80 of ecological features that likely play an important role in shaping the diversity of their viromes,  
81 although to date there is a marked absence of work in area. Initial studies indicate that fish harbour  
82 a remarkable diversity of viruses (particularly RNA viruses) that may exceed that seen in any other  
83 class of vertebrate (Geoghegan et al 2018a, Lauber et al 2017, Shi et al 2018a). In addition, those  
84 viruses present in fish appear to be the evolutionary predecessors of viruses infecting other  
85 vertebrate hosts, generally indicative of a pattern of virus-host co-divergence that can date back  
86 hundreds of millions of years. Despite the apparent diversity and ubiquity of fish viruses, they are  
87 severely under-studied when compared to mammalian and avian viruses.

88 To better understand how host ecology shapes virome composition we sampled viruses from a  
89 diverse range of wild-caught fish. In particular, we considered marine fish spanning 23 species  
90 across nine taxonomic orders, quantifying a variety of ecological characteristics that together may  
91 impact virome composition and abundance. We utilised unbiased bulk RNA-sequencing (meta-  
92 transcriptomics) together with both sequence and protein structural homology searches of known  
93 viruses to: (i) reveal the total virome composition of fish, (ii) describe the phylogenetic relationships  
94 of novel viruses obtained, (iii) determine whether there are associations between virome abundance  
95 and diversity and key aspects of host ecology, including viral richness and composition, and (iv)  
96 explore whether taxonomically-related fish hosts have more similar viromes. The particular  
97 ecological characteristics considered here were: fish taxonomic order, swimming behaviour (i.e.  
98 solitary or schooling fish), preferred climate, mean preferred water temperature; host community  
99 diversity (i.e. multi- or single- species community), average body length, trophic level, and habitat  
100 depth (SI Table 1). In doing so, we provide novel insights into the evolution and ecology of fish  
101 viromes and how they are shaped by their hosts.

102

## 103 **Methods**

104 **Ethics.** Biosafety was approved by Macquarie University (ref: 5201700856). This study involved  
105 dead fish purchased from a fish market; in these cases no animal ethics approval was required. The  
106 pygmy goby was collected under GBRMPA permit G16/37684.1 and JCU Animal Ethics Committee  
107 #A2530.

108 **Fish sample collection.** Dead fish from 23 species were sampled for virome analysis (SI Table 1).  
109 These included 18 new species collected from a fish market in Sydney, Australia, together with four  
110 species from our previous sampling of the same fish market (Geoghegan et al 2018a). These  
111 animals were caught by commercial fisheries in coastal waters in New South Wales, Australia by  
112 several different suppliers in Autumn 2018. By way of contrast, an additional species, the pygmy



113 goby (*Eviota zebrina*), was obtained from the coral reefs of tropical northern Queensland at  
114 approximately the same time. Fish were snapped frozen at -20°C immediately upon capture. Fish  
115 obtained from the market were purchased on the day of catch. Tissues were dissected and stored in  
116 RNALater before being transferred to a -80°C freezer. To increase the likelihood of virus discovery  
117 during metagenomic sequencing, 10 individuals from each species were pooled.

118 **Transcriptome sequencing.** mNGS was performed on fish tissue (liver and gill). Frozen tissue was  
119 partially thawed and submerged in lysis buffer containing 1% β-mercaptoethanol and 0.5% Reagent  
120 DX before tissues were homogenized together with TissueRupture (Qiagen). The homogenate was  
121 centrifuged to remove any potential tissue residues, and RNA from the clear supernatant was  
122 extracted using the Qiagen RNeasy Plus Mini Kit. RNA was quantified using NanoDrop  
123 (ThermoFisher) and tissues from each species were pooled to 3µg per pool (250ng per individual).  
124 Libraries were constructed using the TruSeq Total RNA Library Preparation Protocol (Illumina) and  
125 host ribosomal RNA (rRNA) was depleted using the Ribo-Zero-Gold Kit (Illumina) to facilitate virus  
126 discovery. Paired-end (100bp) sequencing of the RNA library was performed on the HiSeq 2500  
127 platform (Illumina). All library preparation and sequencing were carried out by the Australian  
128 Genome Research Facility (AGRF).

129 **Transcript sequence similarity searching for viral discovery.** Sequencing reads were first quality  
130 trimmed then assembled *de novo* using Trinity RNA-Seq (Haas et al 2013). The assembled contigs  
131 were annotated based on similarity searches against the NCBI nucleotide (nt) and non-redundant  
132 protein (nr) databases using BLASTn and Diamond (BLASTX) (Buchfink et al 2015), and an e-value  
133 threshold of  $1 \times 10^{-5}$  was used as a cut-off to identify positive matches. We removed non-viral hits,  
134 including host contigs with similarity to viral sequences (e.g. endogenous viral elements), as well as  
135 any contigs with high similarity to plant viruses, which were more likely to be derived from food  
136 sources. We focused our analysis on vertebrate-associated viruses by removing viral hits with high  
137 sequence similarity to invertebrate-associated viruses, which more likely originated from  
138 invertebrates within the fish rather than from the fish themselves.

139 **Protein structure similarity searching for viral discovery.** To identify highly divergent viral  
140 transcripts, including those that might be refractory to detection using similarity searching methods  
141 such as the BLAST approach described above, we also employed a protein structure-based  
142 similarity search 'orphan' contigs that did not share sequence similarity with other known  
143 sequences. Accordingly, assembled orphan contigs were translated into open reading frames  
144 (ORFs) using EMBOSS getorf program (Rice et al 2000). ORFs were arbitrarily defined as regions  
145 between two stop codons with a minimum size of 200 amino acids in length. To reduce redundancy,  
146 amino acid sequences were grouped based on sequence identity using the CD-HIT package v4.6.5

147 (Li and Godzik 2006). The resulting data set was then submitted to Phyre2, which uses advanced  
148 remote homology detection methods to build 3D protein models, predict ligand binding sites and  
149 analyse the effect of amino acid variants (Kelley et al 2015). Virus sequences with predicted  
150 structures were selected on the basis of having confidence values  $\geq 90\%$ . Following structure  
151 prediction, we used the associated annotations for preliminary taxonomic classification. To avoid  
152 false positives due to the limited number of available structures in the Protein Data Bank (PDB) for  
153 template modelling, the taxonomic assignment was cross validated with the results from the  
154 Diamond (BLASTX) similarity search. Subsequently, putative viruses were aligned with reference  
155 viral protein sequences at the immediate higher taxonomic level (e.g. genus, family), using MAFFT  
156 v7.4 (E-INS-i algorithm) (Katoh and Standley 2013). Finally, we verified the similarity among  
157 sequences by careful visual inspection of the most highly conserved motifs of target proteins.

158 **Inferring the evolutionary history of fish viruses.** To infer the evolutionary relationships of the  
159 viruses contained in the fish samples, the translated viral contigs were combined with protein  
160 sequences obtained from NCBI RefSeq. The sequences retrieved were then aligned with those  
161 generated here again using MAFFT v7.4 (E-INS-i algorithm) as described above. Ambiguously  
162 aligned regions were removed using trimAl v.1.2 (Capella-Gutierrez et al 2009). To estimate  
163 phylogenetic trees, we selected the optimal model of amino acid substitution identified using the  
164 Bayesian Information Criterion as implemented in Modelgenerator v0.85 (Keane et al 2006) and  
165 analysed the data using the maximum likelihood approach available in IQ-TREE (Nguyen et al 2015)  
166 with 1000 bootstrap replicates. Phylogenetic trees were annotated with FigTree v.1.4.2. New  
167 viruses were named after well-known aquatic fictional characters.

168 **Virome abundance and diversity.** Transcriptomes were quantified using RNA-Seq by Expectation-  
169 Maximization (RSEM) as implemented within Trinity (Li and Dewey 2011). Analyses of abundance  
170 and genetic diversity were performed using R v3.4.0 integrated into RStudio v1.0.143 and plotted  
171 using ggplot2. Both the observed virome richness and Shannon effective (i.e. alpha diversity) were  
172 calculated for each library at the virus family level using modified Rhea script sets (Lagkourdos et  
173 al 2017, Wille et al 2019). We used generalized linear models (GLM) to evaluate the effect of host  
174 taxonomic order, swimming behaviour (solitary or schooling fish), preferred climate, mean  
175 preferred water temperature, host community diversity, average species length, trophic level and  
176 habitat depth on viral abundance and alpha diversity (see SI Table 1 for all variables). Models were  
177  $\chi^2$  tested (LRT) to assess model significance. When the number of factor levels in an explanatory  
178 variable exceeded two, we conducted Tukey posthoc testing (glht) using the *multcomp* package  
179 (Hothorn et al 2008).

180 Beta diversity (i.e. the diversity between samples) was calculated using the Bray Curtis dissimilarity  
181 matrix and virome composition was plotted as a function of nonmetric multidimensional scaling  
182 (NMDS) ordination as well as constrained ordination (CAP) with the and *phyloseq* package  
183 (McMurdie and Holmes 2013). Effects of variables on viral community composition were evaluated  
184 using permanova (Adonis Tests) and Mantel tests with 10,000 permutations using the *vegan*  
185 package (Oksanen 2007). We selected CAP in addition to nMDS because, only the variation that can  
186 be explained by the environmental variables is displayed and analysed.

187

## 188 Results

189 We used mNGS to characterise viral transcripts from 23 marine fish spanning nine taxonomic orders  
190 (19 species from this current study together with four from our previous work; (Geoghegan et al  
191 2018a). We combined data from our previous fish sampling to expand our data set for ecological  
192 inference and apply novel viral protein structural searching methods not used previously. For these  
193 reasons, individual viruses discovered in our previous study are not detailed here. Combined, the  
194 extracted total RNA was organised into 23 libraries for high-throughput RNA sequencing.  
195 Ribosomal RNA-depleted libraries resulted in a median of 45,690,996 (range 33,344,520 –  
196 51,071,142) reads per pool.

197 **Diversity and abundance of viruses in fish.** On average, fish viromes comprised more likely  
198 invertebrate-associated viruses than vertebrate-associated viruses (Figure 1). However, we focused  
199 on the latter since we assume that the vertebrate-associated viruses were directly infecting the fish  
200 sampled rather than being associated with the aquatic environment or a co-infecting parasite, and  
201 hence are more informative in determining how host factors shape virus ecology.

202 Overall, we identified virus transcripts that could be assigned to 11 viral families. With the exception  
203 of the *Hepadnaviridae*, all were RNA viruses. Across all the fish sampled, those viral families found at  
204 relatively high abundances included the *Astroviridae* (at 39% of all viruses discovered),  
205 *Picornaviridae* (19%), *Arenaviridae* (16%), *Reoviridae* (13%) and the *Hepadnaviridae* (9%) (Figure 1a).  
206 Other viral families found at lower relative abundances were the *Matonaviridae* (previously the  
207 *Togaviridae*) (2%), *Paramyxoviridae* (1%), as well as the *Rhabdoviridae*, *Hantaviridae*, *Filoviridae* and  
208 *Flaviviridae* (all <1%) (Figure 1a). The most common vertebrate-associated viruses found in these  
209 fish were picornaviruses (eight species), astroviruses (seven species) and hepadnaviruses (six  
210 species) (Figure 1b). The eastern sea garfish (*Hyporhamphus australis*) harboured the most diverse  
211 virome with four distinct vertebrate-associated viruses (Figure 1b). Six fish contained no vertebrate-

212 associated viruses, and we found no viral sequences in the yellowfin bream (*Acanthopagrus*  
213 *australis*) (Figure 1c). An equivalent analysis of a host reference gene, ribosomal protein S13 (RPS13)  
214 that is stably expressed in fish, revealed similar abundances across species (0.004% – 0.02%),  
215 implying similar sequencing depth across libraries (Figure 1c). RPS13 was, on average, ~55% more  
216 abundant than the total virome.

217 **Evolutionary relationships of fish viruses.** To infer stable phylogenetic relationships among the  
218 viruses sampled and to identify those that are novel, we utilised the most conserved (i.e.  
219 polymerase) viral regions that comprise the RNA-dependent RNA polymerase (RdRp) or the  
220 polymerase (P) ORF in the case of the hepadnaviruses. From this, we identified 25 distinct and  
221 potentially novel vertebrate-associated virus species, in addition to the eight novel viruses  
222 described previously (Geoghegan et al 2018a) (SI Table 2). All novel viruses shared sequence  
223 similarity to other known fish viruses with the exception of those viruses found in the *Matonaviridae*  
224 and *Rhabdoviridae* (Figure 2, SI Figure 1; see below).

225 Among the viruses identified was a fish rubivirus (fedallah virus) in the tiger flathead  
226 (*Neoplatycephalus richardsoni*) - the first fish virus found in the *Matonaviridae*. This novel viral  
227 sequence shared only 35% amino acid similarity with its closest relative - Guangdong Chinese water  
228 snake rubivirus (Shi et al 2018a). All other viruses within this family are distantly related human  
229 rubella viruses, and it is therefore likely that these non-human viruses constitute a discrete genus.  
230 Another divergent virus discovered in this analysis is pip virus (*Rhabdoviridae*) in the eastern sea  
231 garfish (*Hyporhamphus australis*), which was most closely related to the Fujian dimarhabdovirus  
232 sampled from an amphibian host, sharing 45% amino acid RdRp sequence identity. This highly  
233 divergent virus was only identified by using protein structure homology, and forms a clade that is  
234 distinct from other fish rhabdoviruses (Figure 2; SI Figure 1). We also discovered two novel viral  
235 sequences in the *Filoviridae* in John Dory (*Zeus faber*) and the blue spotted goatfish (*Upeneichthys*  
236 *lineatus*). These viruses – termed here ahab virus and starbuck virus, respectively – shared sequence  
237 similarity to the only other known fish filovirus, Wenling filefish (Shi et al 2018a). With the exception  
238 of these fish viruses, all other known filoviruses including Ebola and Marburg viruses, are found in  
239 mammalian hosts, notably humans, bats and primates.

240 We also found numerous viruses that cluster within established clades of fish viruses. For example,  
241 aronnax virus, a member of the *Hantaviridae* discovered in the pygmy goby (*Eviota zebrina*),  
242 grouped with other hantaviruses recently found in fish (Figure 2). Although they were previously  
243 only thought to infect mammals, hantaviruses have now been found to infect amphibians, jawless  
244 fish and ray-finned fish (Shi et al 2018a). The evolutionary history of the *Paramyxoviridae* shows two  
245 distinct fish virus lineages, of which both ned virus and nemo virus in the barramundi and pygmy

246 goby, respectively, grouped with Pacific spade-nose shark paramyxovirus, and shared 50% and 45%  
247 amino acid L gene sequence similarity. This group of fish viruses is phylogenetically distinct from  
248 other paramyxoviruses. We also found novel fish viruses in the *Flaviviridae*, *Arenaviridae* and  
249 *Reoviridae*: although these grouped with other fish viruses, they greatly expand the known diversity  
250 of these virus families. Finally, as noted above, the most abundant viruses fell within the  
251 *Picornaviridae* and *Astroviridae*, and all shared sequence similarity to other fish viruses. Both single-  
252 stranded positive-sense RNA viruses, picornaviruses and astroviruses exist as small icosahedral  
253 capsids with no external envelope, which may aid their preservation in harsh marine environments.

254 The only DNA viruses we revealed were novel hepadnaviruses found in bonito (*Sarda australis*),  
255 ludrick (*Girella tricuspidata*) and eastern school whiting (*Sillago flindersi*), which fell into the  
256 divergent hepadna-like viruses, *Nackednavirus*, found in a number of fish species (Lauber et al.  
257 2017), while daggoo virus in sand whiting (*Sillago ciliate*) expanded the fish virus clade that is more  
258 closely related to mammalian hepatitis B viruses (Dill et al 2016) (Figure 2).

#### 259 **Associations of host taxonomy and ecology with virome composition.**

260 To understand the role of host ecological variables on viral ecology, we examined the role of eight  
261 host traits on shaping viral abundance (the proportion of viral reads in each sample), alpha diversity  
262 (the diversity within each sample, measured by observed richness and Shannon diversity) and beta  
263 diversity (the diversity between samples). The host features examined were: host taxonomic order,  
264 swimming behaviour (solitary or schooling fish), preferred climate, mean preferred water  
265 temperature, community diversity, average species length, trophic level and habitat depth.

266 This analysis revealed that fish phylogenetic relationships (as reflected in taxonomic order), played  
267 the most important role in shaping the composition of fish viromes. This pattern was consistent  
268 when assessing viral abundance, alpha diversity and beta diversity (Figures 3 and 4). In addition, fish  
269 order ( $\chi^2=0.003$ ,  $df=8$ ,  $p=0.0049$ ) and mean preferred water temperature ( $\chi^2=0.008$ ,  $df=1$ ,  $p=0.035$ )  
270 were important predictors of viral abundance, such that Scopaeniformes (i.e. bigeye ocean perch,  
271 red gurnard, tiger flathead, and eastern red scorpionfish) had significantly higher viral abundance  
272 compared to Pleuronectiformes (i.e. largemouth flounder) (Tukey:  $z=3.766$ ,  $p=0.00479$ ), while viral  
273 abundance had a negative relationship to mean preferred water temperature (Figure 3).

274 We used two measures of alpha diversity: observed richness, a count of the number of viral families,  
275 and Shannon diversity, which also incorporates abundance. Observed richness was best explained  
276 by fish order ( $\chi^2=22.839$ ,  $df=8$ ,  $p=3.8^{-6}$ ) and habitat depth ( $\chi^2=3.914$ ,  $df=2$ ,  $p=0.032$ ), while Shannon  
277 diversity was best explained by fish order ( $\chi^2=0.96$ ,  $df=8$ ,  $p=0.016$ ) and community diversity  
278 ( $\chi^2=0.41$ ,  $df=1$ ,  $p=0.05$ ), with a larger Shannon diversity in multispecies communities compared with

279 single species communities. As with viral abundance, there was a significant difference in alpha  
280 diversity between Scopaeniformes compared to Pleuronectiformes (Tukey Richness  $z=3.039$ ,  
281  $p=0.0495$ ; Tukey Shannon  $z=2.845$ ,  $p=0.05$ ). Notably, mid-water fish had decreased viral richness  
282 compared to benthic fish (Tukey  $z=-2.452$ ,  $p=0.0338$ ), and fish that reside in multispecies  
283 communities had a larger Shannon diversity compared to single species communities ( $\chi^2=0.17089$ ,  
284  $df=1$ ,  $p=0.05$ ) (Figure 3).

285 Our analysis also revealed that fish order ( $R^2=0.57215$ ,  $p=0.003$ ), swimming behaviour ( $R^2=0.09904$ ,  
286  $p=0.005$ ), climate ( $R^2=0.13315$ ,  $p=0.012$ ) and mean preferred water temperature ( $R^2=0.1005$ ,  $p=0.05$ )  
287 are significant predictors of beta diversity. A conical constrained ordination (CAP) model developed  
288 using these factors was significant ( $F_{11}=2.37$ ,  $p=0.002$ ) (Figure 4). In this ordination analyses, only  
289 the variation that can be explained by the environmental variables is displayed and analysed (Figure  
290 4).

291

## 292 Discussion

293 The metagenomic revolution is enabling us to uncover more of a largely unknown virosphere,  
294 including highly divergent viruses that often elude characterisation. Here, we utilised mNGS to  
295 reveal new viruses in fish and used these data to better understand the host ecological factors that  
296 have had the greatest impact on shaping virus diversity and abundance. To do so we characterised  
297 the viromes of 23 species of marine fish that spanned nine taxonomic orders, with our analysis  
298 revealing that host phylogeny (taxonomy) plays a central role in shaping fish viromes. We also  
299 found that several ecological features were also important determinants of virus abundance and/or  
300 diversity, namely preferred mean water temperature, climate, habitat depth, community diversity  
301 and whether fish swim in schools or are solitary. In addition, we have identified 25 novel viruses  
302 spanning 11 different virus families, including the first fish virus in the *Matonaviridae*.

303 Many of the viruses identified in this study were phylogenetically related to other, recently  
304 discovered, fish viruses (Dill et al 2016, Geoghegan et al 2018a, Lauber et al 2017, Shi et al 2018a).  
305 However, there were a few notable exceptions. Fedallah virus in the tiger flathead in the  
306 *Matonaviridae* represents the only fish viral species in this family, which forms a distinct clade with a  
307 rubivirus discovered in a Chinese water snake. Human rubella virus is the only other virus previously  
308 known within this family. The discovery of this phylogenetically distinct fish virus tentatively  
309 suggests the possibility of a fish host origin for this family, although it is clear that a wider set of  
310 hosts need to be sampled. Indeed, this might also be the case for other virus families such as the

311 *Hantaviridae* and *Filoviridae*, as fish viruses often fall basal to viruses in other vertebrate hosts such  
312 as birds and mammals (also see Shi et al 2018a). In contrast, in some other virus families such as the  
313 *Astroviridae*, *Picornaviridae*, *Flaviviridae* and *Rhabdoviridae*, fish viruses are found throughout the  
314 phylogeny which is suggestive of a past history of host-jumping. Regardless, available data  
315 suggests that fish viruses harbour more diversity compared to the better studied mammalian and  
316 avian viruses within these families, and that the discovery of novel viruses in fish has expanded our  
317 knowledge of the diversity, evolutionary history and host range of RNA viruses in general.

318 As well as identifying new viruses, we investigated host ecological features may have shaped the  
319 overall composition of fish viruses. A key result from this analysis was that fish virome composition,  
320 reflected in measures of viral richness, abundance and diversity, is predominantly shaped by the  
321 phylogenetic relationships (i.e. taxonomy) of the host in question. This in turn suggests that fish  
322 viruses might have co-diverged with their hosts over evolutionary time-scales (Geoghegan et al  
323 2017), a pattern supported by the general relationship between vertebrate host class and virus  
324 phylogeny observed for RNA viruses as a whole (Shi et al 2018a). Alternatively, it is possible that the  
325 strong association of host taxonomy and virome composition is indicative of preferential host  
326 switching among fish species, otherwise known as the 'phylogenetic distance effect' (Longdon et al  
327 2014), perhaps because viruses spread more often between phylogenetically closely related hosts  
328 due to the use of similar cell receptors (Charleston and Robertson 2002).

329 Combined with host order, virus abundance was also negatively associated with the hosts' preferred  
330 water temperature. Specifically, our analysis revealed that viruses were more abundant in fish that  
331 preferred cooler temperatures compared to those fish preferring warmer temperatures. Indeed,  
332 virus transmission and disease outbreaks have been shown to be influenced by temperature and  
333 seasonality in farmed fish (Crane and Hyatt 2011). Moreover, for some viruses, host mortality is  
334 water temperature dependent. For example, a highly infectious disease in fish, nervous necrosis  
335 virus, is more pathogenic at higher temperatures (Toffan et al 2016) while infectious hematopoietic  
336 necrosis virus, which causes disease in salmonid fish such as trout and salmon, causes mortality only  
337 at low temperatures (Dixon et al 2016). As the oceans continue to warm, it is crucial to understand  
338 the impact of increased temperatures on both marine life and virus evolution and emergence,  
339 especially as it is projected that outbreaks of marine diseases are likely to increase in frequency and  
340 severity (Dallas and Drake 2016, Karvonen et al 2010).

341 Also, of note was that fish living in a diverse community harboured more diverse viromes at a higher  
342 abundance compared to fish that live in less diverse, single-species communities. Previously, host  
343 community diversity has been hypothesised to lead to a decrease in infectious disease risk through  
344 the theory of the 'dilution effect' (Schmidt and Ostfeld, 2001). This theory views an increase in host

345 species' community diversity as likely to reduce disease risk on the basis that alternative host  
346 species would negatively influence the preferred host as reservoirs, and both experimental and field  
347 studies have shown this phenomenon to occur across many host systems, particularly those  
348 involving vector-borne disease (Keesing et al 2006, LoGiudice et al 2003, Ostfeld and Keesing 2012).  
349 Although it might be reasonable to assume that increased virus abundance and diversity is directly  
350 correlated with disease risk, the association between host community diversity with that of virus  
351 diversity and abundance has not previously been tested. Our results indicated that high community  
352 diversity in fish increases virus diversity and abundance. It might be the case that increases in  
353 community diversity in fish simply increases the total number of hosts in the system in turn  
354 increasing viral diversity, particularly since host jumping between fish appears to be common in fish  
355 viruses (Geoghegan et al 2018a).

356 To compare virome diversity between fish species, we measured beta diversity. CAP analysis  
357 demonstrated that beta diversity in fish is multifactorial, with previously significant factors such as  
358 temperature and host order being significant. Additionally, we found that swimming behaviour (i.e.  
359 swimming in schools or solitary) and climate (subtropical, temperate and tropical) to further  
360 contribute to the variation in virome diversity. That is, virome composition was typically more  
361 similar among fish that exhibited the same ecological traits, such as swimming behaviour. We have  
362 previously shown that schooling fish harbour more viruses compared to their solitary counterparts  
363 (Geoghegan et al 2018a) since close contact while shoaling likely facilitates virus transmission  
364 between hosts (Johnson et al. 2011). Although here we found no difference in virus species richness  
365 between schooling and solitary fish, our results indicate that swimming behaviour is nevertheless  
366 important in shaping virome composition.

367 Finally, it is noteworthy that since these fish species were market-bought rather than being directly  
368 sampled during fishing trips (with the exception of the pygmy goby), it is possible that viruses with  
369 short durations of infection were not detected. This notwithstanding, the diversity of viruses  
370 discovered here provides further support for the proposition that fish harbour a very large number  
371 of viruses (Shi et al. 2018; Lauber et al, 2017). Even the pygmy goby, one of the shortest-lived  
372 vertebrates on earth (Depczynski and Bellwood 2005), harboured novel viruses that were assigned  
373 to three distinct virus families.

374 In sum, the new viruses discovered here greatly expand our knowledge of the evolutionary history  
375 of many virus families, with viruses identified in fish species that span highly diverse taxonomic  
376 orders. More broadly, the use of metagenomics coupled with a diverse multi-host, tractable system  
377 such as fish has enabled us to reveal some of the host ecological factors that shape virome  
378 composition.



379

## 380 Data Availability

381 All sequence reads generated in this project are available under the NCBI Short Read Archive  
382 (SRA) under BioProject XXX-XXX and all consensus virus genetic sequences have been deposited  
383 in GenBank under accession XXX-XXX.

384

## 385 Acknowledgements

386 We thank the New South Wales Department of Primary Industries for help sourcing fish samples.  
387 We thank efishalbum.com for fish images in Figure 1, which were used with permission. ECH and  
388 DRB are funded by ARC Australian Laureate Fellowships (FL170100022 and FL190100062,  
389 respectively). This work was partly funded by a Macquarie University Grant awarded to JLG.

## 390 Figures

391 **Figure 1.** (A) Total standardized abundance of vertebrate-associated viruses (at the level of virus  
392 family) across the fish species examined. (B) Normalised viral abundance set out on a backbone of  
393 the fish host phylogeny at the order level. (C) Standardised number of total viral reads (black),  
394 vertebrate-associated viral reads (grey) and host reference gene ribosomal protein S13 (RPS13)  
395 (orange) in each species library.

396 **Figure 2.** Phylogenetic relationships of likely vertebrate-associated viruses identified here (see SI  
397 Figure 1 for taxon labels). The maximum likelihood phylogenetic trees show the topological position  
398 of the newly discovered viruses (blue circles) and those identified in an earlier study (Geoghegan et  
399 al. 2018), in the context of their closest phylogenetic relatives. Branches are highlighted to  
400 represent host class (fish = blue; mammals = red; birds, reptiles and amphibians = yellow; vector-  
401 borne (mammals and arthropods) = green). All branches are scaled according to the number of  
402 amino acid substitutions per site and trees were mid-point rooted for clarity only. An asterisk  
403 indicates node support of >70% bootstrap support.

404 **Figure 3.** Significant explanatory variables in generalized linear models (GLM) for viral abundance  
405 and two measures of alpha diversity. Viral abundance is best explained by (A) fish host order and (B)  
406 mean preferred water temperature. Alpha diversity is best explained by (C) host order and (D)  
407 preferred habitat (Observed Richness) and by (E) host order and (F) host community diversity  
408 (Shannon Diversity). Stars indicate significant differences between groups determined by posthoc  
409 Tukey tests. Points represent different fish species and are coloured by host order.

410 **Figure 4.** Constrained (canonical) ordination (CAP) using the bray Curtis dissimilarity matrix for  
411 viromes of fish species. Vectors indicate direction and strength (length) of relationships between  
412 species and significant explanatory variables. Colour, shape and fill correspond to host species  
413 order, climate and schooling behaviour, respectively.

414

## 415 Supplementary Information

416 **SI Table 1.** Fish species sampled and the host ecological features used in this analysis, obtained  
417 from fishbase.org. These comprised fish taxonomic order, swimming behaviour (i.e. solitary or  
418 schooling fish), preferred climate, mean preferred water temperature, host community diversity  
419 (i.e. multi- or single- species community), average species length, trophic level and habitat depth

420 **SI Table 2.** Amino acid identity, contig length and relative frequency of the viruses identified in this  
421 study. This does not include viruses described in (Geoghegan et al 2018a).

422 **SI Figure 1.** Phylogenetic relationships of likely vertebrate-associated viruses identified here. The  
423 maximum likelihood phylogenetic trees show the topological position of the newly discovered  
424 viruses (blue circles) and those identified in an earlier study (Geoghegan et al. 2018), in the context  
425 of their closest phylogenetic relatives. Branches are highlighted to represent host class (fish = blue;  
426 mammals = red; birds, reptiles and amphibians = yellow; vector-borne (mammals and arthropods) =  
427 green). All branches are scaled according to the number of amino acid substitutions per site and  
428 trees were mid-point rooted for clarity only. An asterisk indicates node support of >70% bootstrap  
429 support.

430

## 431 References

- 432 Alarcon-Schumacher T, Guajardo-Leiva S, Anton J, Diez B (2019). Elucidating viral communities  
433 during a phytoplankton bloom on the west Antarctic peninsula. *Front Microbiol* **10**: 1014.  
434
- 435 Bergh Ø, Børshheim KY, Bratbak G, Heldal M (1989). High abundance of viruses found in aquatic  
436 environments. *Nature* **340**: 467-468.  
437
- 438 Betancur-R R, Wiley EO, Arratia G, Acero A, Bailly N, Miya M *et al* (2017). Phylogenetic classification  
439 of bony fishes. *BMC Evol Biol* **17**: 162.  
440
- 441 Breitbart M, Rohwer F (2005). Here a virus, there a virus, everywhere the same virus? *Trends*  
442 *Microbiol* **13**: 278-284.  
443
- 444 Buchfink B, Xie C, Huson DH (2015). Fast and sensitive protein alignment using DIAMOND. *Nat*  
445 *Methods* **12**: 59-60.  
446
- 447 Capella-Gutierrez S, Silla-Martinez JM, Gabaldon T (2009). trimAl: a tool for automated alignment  
448 trimming in large-scale phylogenetic analyses. *Bioinformatics* **25**: 1972-1973.  
449
- 450 Chang W-S, Eden J-S, Hartley WJ, Shi M, Rose K, Holmes EC (2019). Metagenomic discovery and  
451 co-infection of diverse wobbly possum disease viruses and a novel hepacivirus in Australian  
452 brushtail possums. *BMC One Health Outlook* **1**: 5.  
453
- 454 Charleston MA, Robertson DL (2002). Preferential host switching by primate lentiviruses can  
455 account for phylogenetic similarity with the primate phylogeny. *Syst Biol* **51**: 528-535.  
456
- 457 Coutinho FH, Silveira CB, Gregoracci GB, Thompson CC, Edwards RA, Brussaard CPD *et al* (2017).  
458 Marine viruses discovered via metagenomics shed light on viral strategies throughout the oceans.  
459 *Nat Commun* **8**: 15955.  
460
- 461 Crane M, Hyatt A (2011). Viruses of fish: an overview of significant pathogens. *Viruses* **3**: 2025-2046.  
462
- 463 Dallas T, Drake JM (2016). Fluctuating temperatures alter environmental pathogen transmission in  
464 a Daphnia-pathogen system. *Ecol Evol* **6**: 7931-7938.  
465
- 466 De Corte D, Sintes E, Yokokawa T, Reinthaler T, Herndl GJ (2012). Links between viruses and  
467 prokaryotes throughout the water column along a North Atlantic latitudinal transect. *ISME J* **6**:  
468 1566-1577.  
469
- 470 Depczynski M, Bellwood DR (2005). Shortest recorded vertebrate lifespan found in a coral reef fish.  
471 *Curr Biol* **15**: R288-289.  
472
- 473 Dill JA, Camus AC, Leary JH, Di Giallonardo F, Holmes EC, Ng TF (2016). Distinct viral lineages from  
474 fish and amphibians reveal the complex evolutionary history of hepadnaviruses. *J Virol* **90**: 7920-  
475 7933.  
476
- 477 Dixon P, Paley R, Alegria-Moran R, Oidtmann B (2016). Epidemiological characteristics of infectious  
478 hematopoietic necrosis virus (IHNV): a review. *Vet Res* **47**: 63.  
479

- 480 Geoghegan JL, Duchêne S, Holmes EC (2017). Comparative analysis estimates the relative  
481 frequencies of co-divergence and cross-species transmission within viral families. *PLoS Pathog* **13**:  
482 e1006215.
- 483  
484 Geoghegan JL, Di Giallonardo F, Cousins K, Shi M, Williamson JE, Holmes EC (2018a). Hidden  
485 diversity and evolution of viruses in market fish. *Virus Evol* **4**: vey031-vey031.
- 486  
487 Geoghegan JL, Pirotta V, Harvey E, Smith A, Buchmann JP, Ostrowski M *et al* (2018b). Virological  
488 sampling of inaccessible wildlife with drones. *Viruses* **10**.
- 489  
490 Gregory AC, Zayed AA, Conceicao-Neto N, Temperton B, Bolduc B, Alberti A *et al* (2019). Marine  
491 DNA viral macro- and microdiversity from pole to pole. *Cell* **177**: 1109-1123.e1114.
- 492  
493 Haas BJ, Papanicolaou A, Yassour M, Grabherr M, Blood PD, Bowden J *et al* (2013). De novo  
494 transcript sequence reconstruction from RNA-Seq: reference generation and analysis with Trinity.  
495 *Nat Protoc* **8**: 10.1038/nprot.2013.1084.
- 496  
497 Hothorn T, Bretz F, Westfall P (2008). Simultaneous inference in general parametric models. *Biom J*  
498 **50**: 346-363.
- 499  
500 Jarungsriapisit J, Nuñez-Ortiz N, Nordbø J, Moore LJ, Mæhle S, Patel S (2020). The effect of  
501 temperature on the survival of salmonid alphavirus analysed using in vitro and in vivo methods.  
502 *Aquac* **516**: 734647.
- 503  
504 Karvonen A, Rintamaki P, Jokela J, Valtonen ET (2010). Increasing water temperature and disease  
505 risks in aquatic systems: climate change increases the risk of some, but not all, diseases. *Int J*  
506 *Parasitol* **40**: 1483-1488.
- 507  
508 Katoh K, Standley DM (2013). MAFFT multiple sequence alignment software version 7:  
509 improvements in performance and usability. *Mol Biol Evol* **30**: 772-780.
- 510  
511 Keane TM, Creevey CJ, Pentony MM, Naughton TJ, McLnerney JO (2006). Assessment of methods  
512 for amino acid matrix selection and their use on empirical data shows that ad hoc assumptions for  
513 choice of matrix are not justified. *BMC Evol Biol* **6**: 29.
- 514  
515 Keesing F, Holt RD, Ostfeld RS (2006). Effects of species diversity on disease risk. *Ecol Lett* **9**: 485-  
516 498.
- 517  
518 Kelley LA, Mezulis S, Yates CM, Wass MN, Sternberg MJE (2015). The Phyre2 web portal for protein  
519 modeling, prediction and analysis. *Nat Protoc* **10**: 845-858.
- 520  
521 Lagkouvardos I, Fischer S, Kumar N, Clavel T (2017). Rhea: a transparent and modular R pipeline for  
522 microbial profiling based on 16S rRNA gene amplicons. *PeerJ* **5**: e2836.
- 523  
524 Lara E, Vaqué D, Sà EL, Boras JA, Gomes A, Borrull E *et al* (2017). Unveiling the role and life  
525 strategies of viruses from the surface to the dark ocean. *Sci Adv* **3**: e1602565.
- 526  
527 Lauber C, Seitz S, Mattei S, Suh A, Beck J, Herstein J *et al* (2017). Deciphering the origin and  
528 evolution of hepatitis B viruses by means of a family of non-enveloped fish viruses. *Cell Host*  
529 *Microbe*.
- 530

- 531 Li B, Dewey CN (2011). RSEM: accurate transcript quantification from RNA-Seq data with or  
532 without a reference genome. *BMC Bioinform* **12**: 323.  
533
- 534 Li W, Godzik A (2006). Cd-hit: a fast program for clustering and comparing large sets of protein or  
535 nucleotide sequences. *Bioinformatics* **22**: 1658-1659.  
536
- 537 LoGiudice K, Ostfeld RS, Schmidt KA, Keesing F (2003). The ecology of infectious disease: Effects of  
538 host diversity and community composition on Lyme disease risk. *PNAS* **100**: 567-571.  
539
- 540 Longdon B, Brockhurst MA, Russell CA, Welch JJ, Jiggins FM (2014). The evolution and genetics of  
541 virus host shifts. *PLoS Pathog* **10**: e1004395.  
542
- 543 Maranger R, Bird DF (1995). Viral abundance in aquatic systems: a comparison between marine and  
544 fresh waters. *Mar* **121**: 217-226.  
545
- 546 McMurdie PJ, Holmes S (2013). phyloseq: an R package for reproducible interactive analysis and  
547 graphics of microbiome census data. *PLoS One* **8**: e61217.  
548
- 549 Middelboe M, Brussaard CPD (2017). Marine viruses: key players in marine ecosystems. *Viruses* **9**:  
550 302.  
551
- 552 Nguyen L-T, Schmidt HA, von Haeseler A, Minh BQ (2015). IQ-TREE: a fast and effective stochastic  
553 algorithm for estimating maximum-likelihood phylogenies. *Mol Biol Evol* **32**: 268-274.  
554
- 555 Oksanen J, Blanchet, F.G., Kindt, R., Legendre, P., Minchin, P.R., O'Hara, R.B., Simpson, G.L.,  
556 Solymos, P., Stevens, M.H.H. and Wagner, H. (2007). Vegan: community ecology package. R v. 2.2-  
557 0.  
558
- 559 Ostfeld RS, Keesing F (2012). Effects of host diversity on infectious disease. *Annu Rev Ecol Evol Syst*  
560 **43**: 157-182.  
561
- 562 Paez-Espino D, Eloe-Fadrosh EA, Pavlopoulos GA, Thomas AD, Huntemann M, Mikhailova N *et al*  
563 (2016). Uncovering Earth's virome. *Nature* **536**: 425-430.  
564
- 565 Pettersson JHO, Piorkowski G, Mayxay M, Rattanaovong S, Vongsouvath M, Davong V *et al* (2019).  
566 Meta-transcriptomic identification of hepatitis B virus in cerebrospinal fluid in patients with central  
567 nervous system disease. *Diagn Microbiol Infect Dis* **95**: 114878-114878.  
568
- 569 Porter AF, Shi M, Eden J-S, Zhang Y-Z, Holmes EC (2019). Diversity and evolution of novel  
570 invertebrate DNA viruses revealed by meta-transcriptomics. *Viruses* **11**: 1092.  
571
- 572 Rice P, Longden I, Bleasby A (2000). EMBOSS: the European molecular biology open software suite.  
573 *Trends Genet* **16**: 276-277.  
574
- 575 Shi M, Lin X-D, Tian J-H, Chen L-J, Chen X, Li C-X *et al* (2016). Redefining the invertebrate RNA  
576 virosphere. *Nature* **540**: 539-543.  
577
- 578 Shi M, Lin X-D, Chen X, Tian J-H, Chen L-J, Li K *et al* (2018a). The evolutionary history of vertebrate  
579 RNA viruses. *Nature* **556**: 197-202.  
580

581 Shi M, Zhang YZ, Holmes EC (2018b). Meta-transcriptomics and the evolutionary biology of RNA  
582 viruses. *Virus Res* **243**: 83-90.  
583  
584 Suttle CA (2005). Viruses in the sea. *Nature* **437**: 356-361.  
585  
586 Tirosh O, Conlan S, Deming C, Lee-Lin S-Q, Huang X, Barnabas BB *et al* (2018). Expanded skin  
587 virome in DOCK8-deficient patients. *Nat Med* **24**: 1815-1821.  
588  
589 Toffan A, Panzarin V, Toson M, Cecchetti K, Pascoli F (2016). Water temperature affects  
590 pathogenicity of different betanodavirus genotypes in experimentally challenged *Dicentrarchus*  
591 *labrax*. *Dis Aquat Organ* **119**: 231-238.  
592  
593 Whittington RJ, Reddacliff GL (1995). Influence of environmental temperature on experimental  
594 infection of redfin perch (*Perca fluviatilis*) and rainbow trout (*Oncorhynchus mykiss*) with epizootic  
595 haematopoietic necrosis virus, an Australian iridovirus. *Aust Vet J* **72**: 421-424.  
596  
597 Wille M, Shi M, Klaassen M, Hurt AC, Holmes EC (2019). Virome heterogeneity and connectivity in  
598 waterfowl and shorebird communities. *ISME J* **13**: 2603-2616.  
599  
600 Wille M (2020). Unravelling virus community ecology in bats through the integration of  
601 metagenomics and community ecology. *Mol Ecol* **29**: 23-25.  
602  
603 Zhang Y-Z, Shi M, Holmes EC (2018). Using metagenomics to characterize an expanding  
604 virosphere. *Cell* **172**: 1168-1172.  
605  
606  
607

# a Total standardised viral abundance

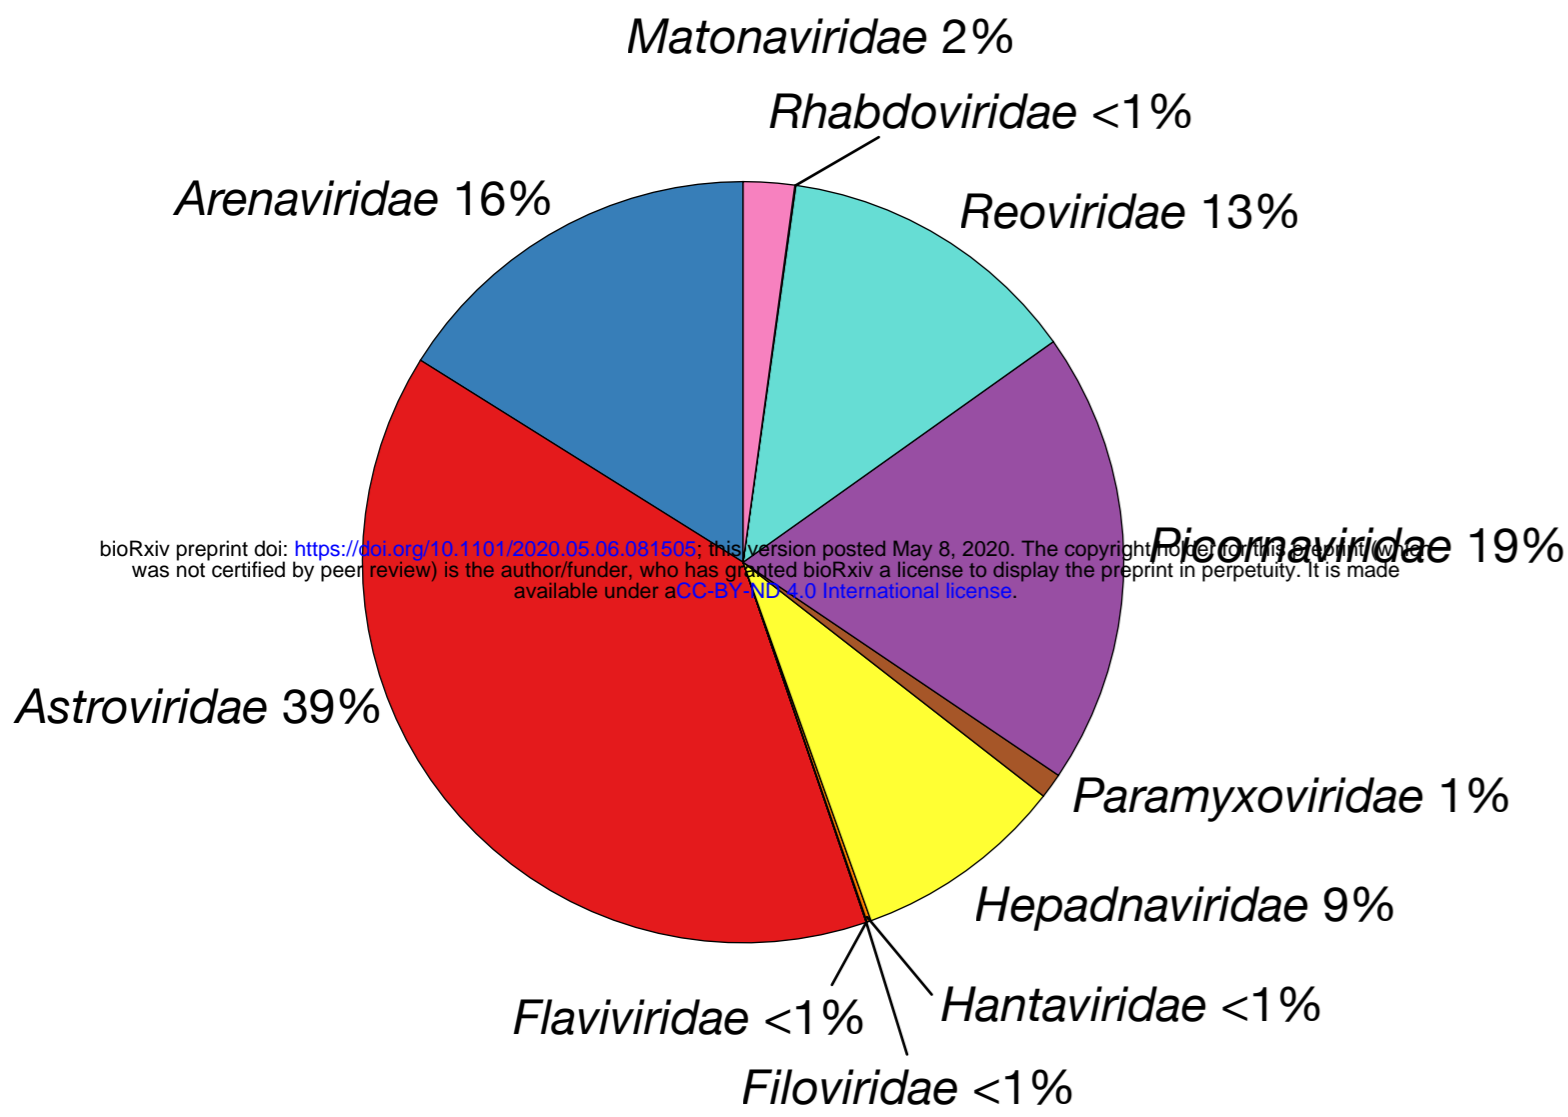

## Vertebrate-associated virus families

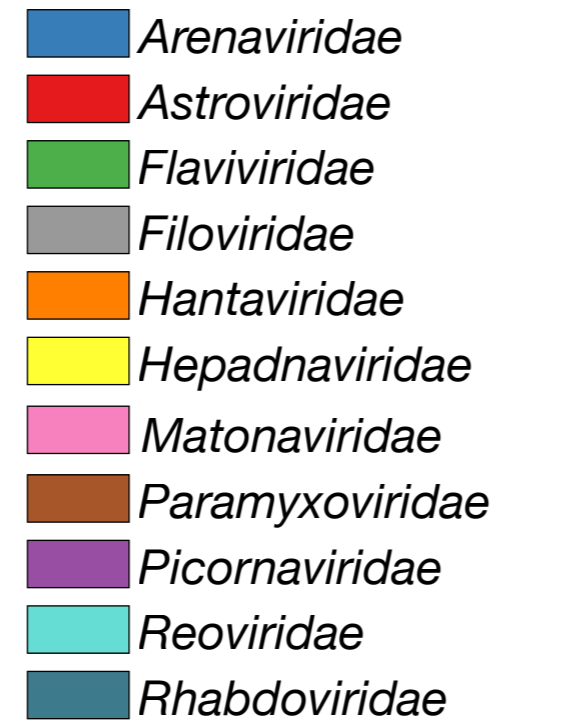

□ No vertebrate-associated virus detected

# b Host order phylogeny

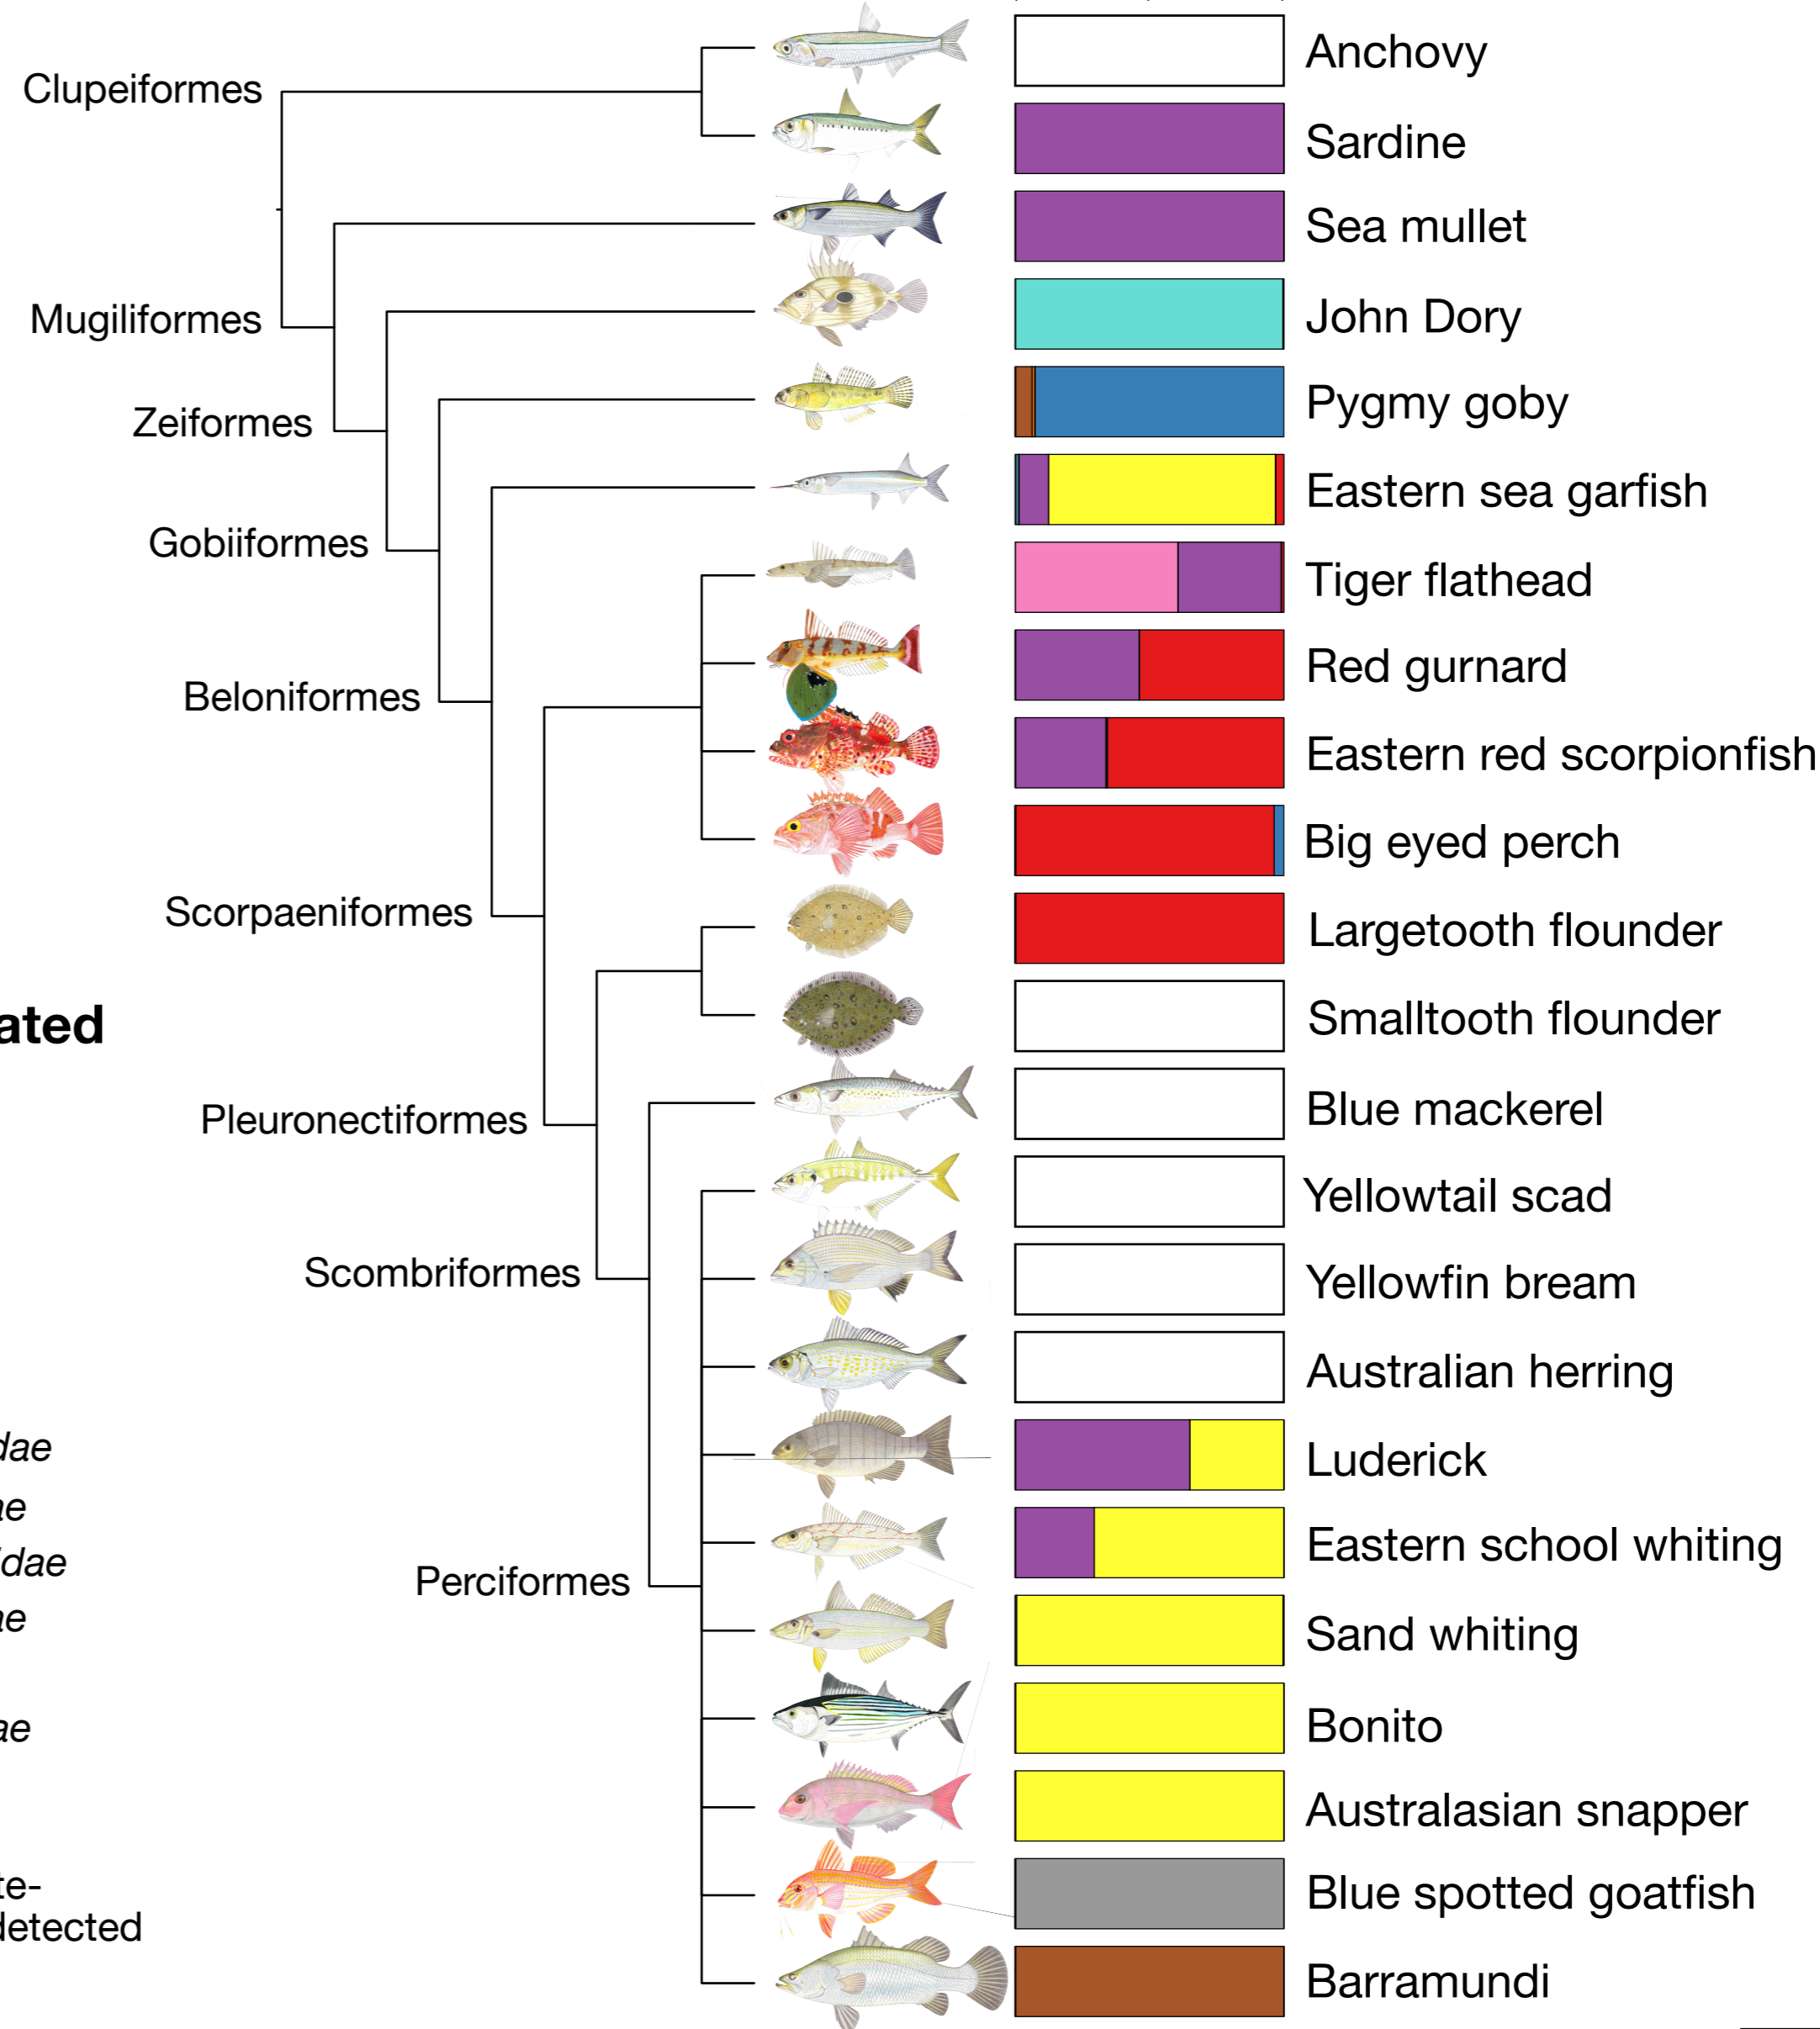

# c Standardised no. viral reads (log)

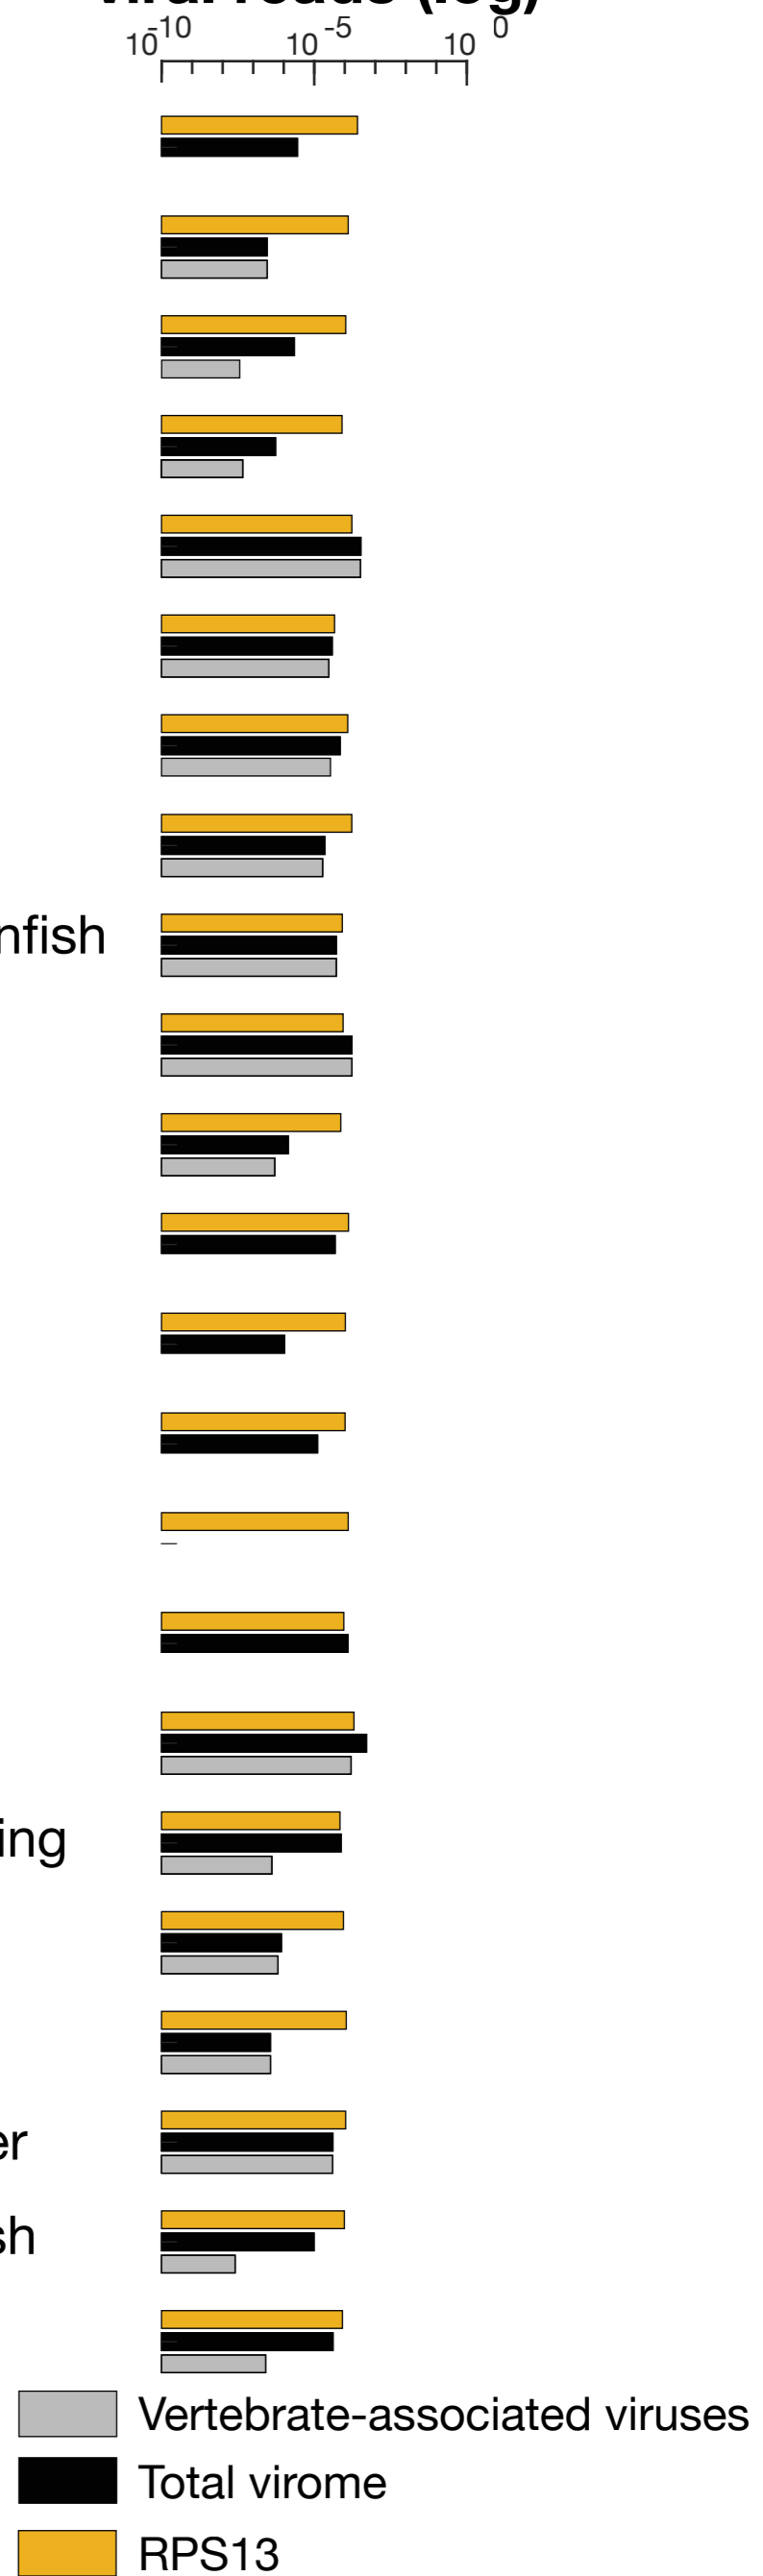



# Hantaviridae

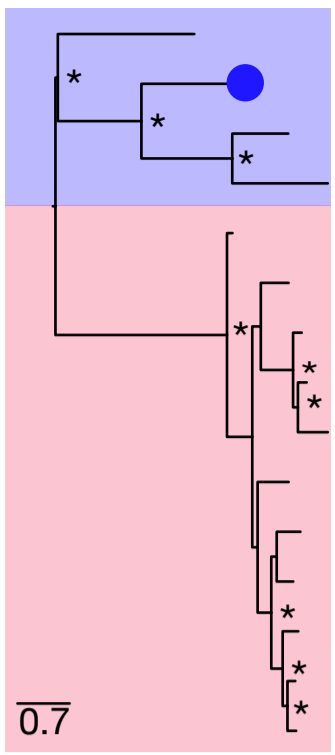

# Filoviridae

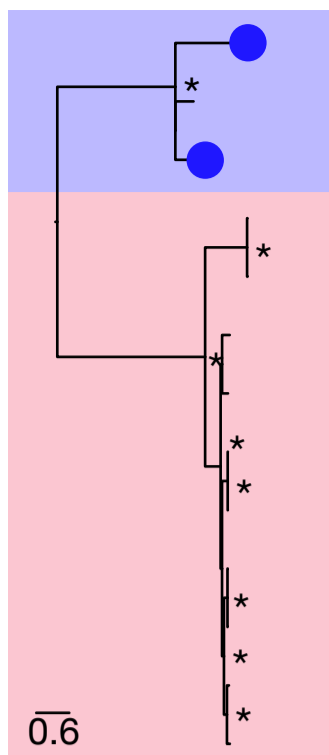

# Picornaviridae

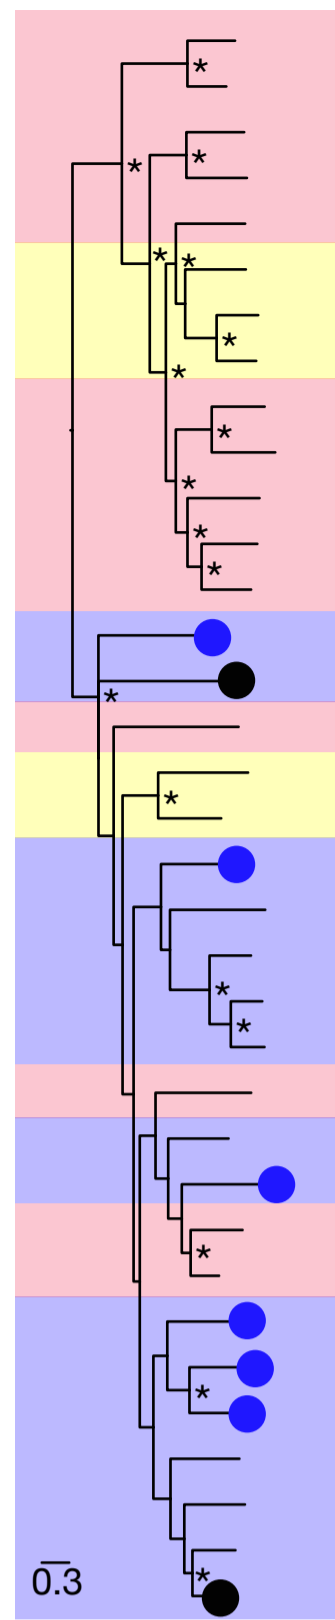

# Paramyxoviridae

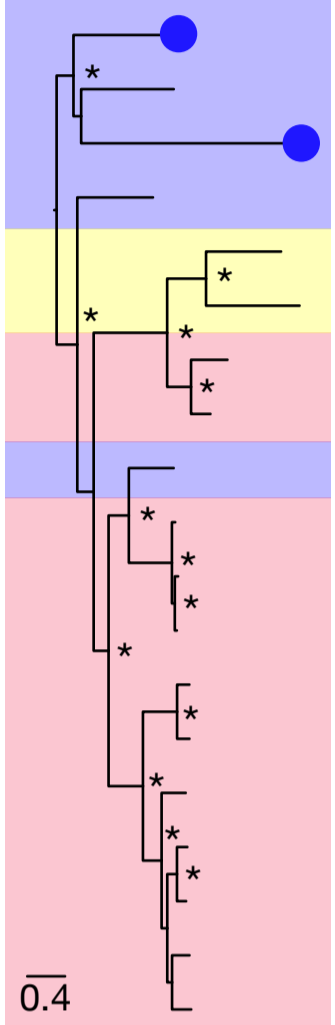

# Hepadnaviridae

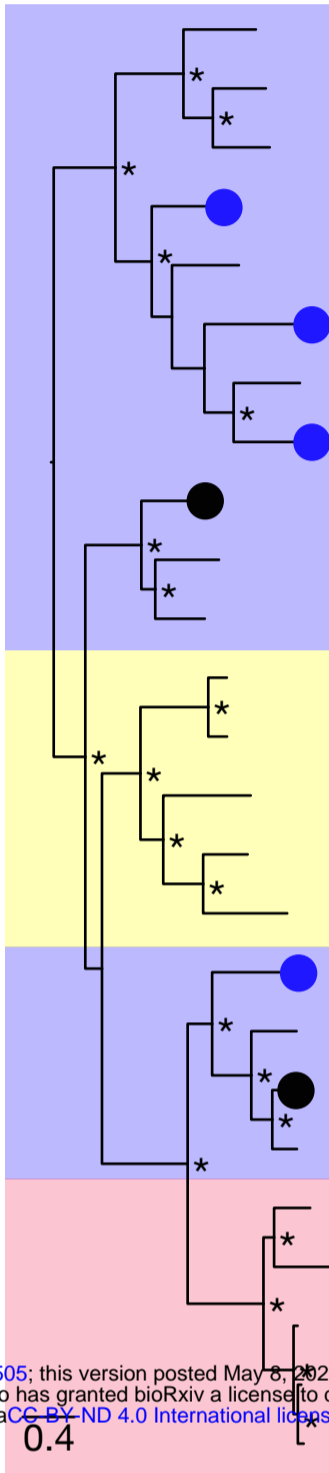

# Reoviridae

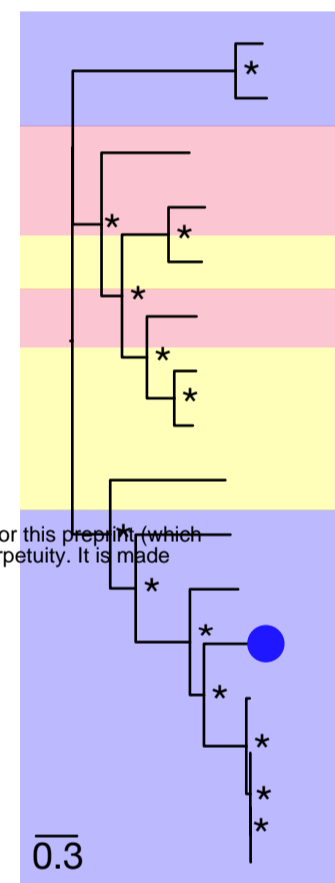

# Arenaviridae

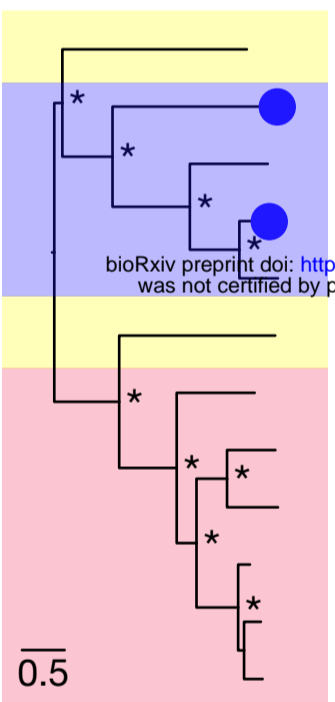

# Rhabdoviridae

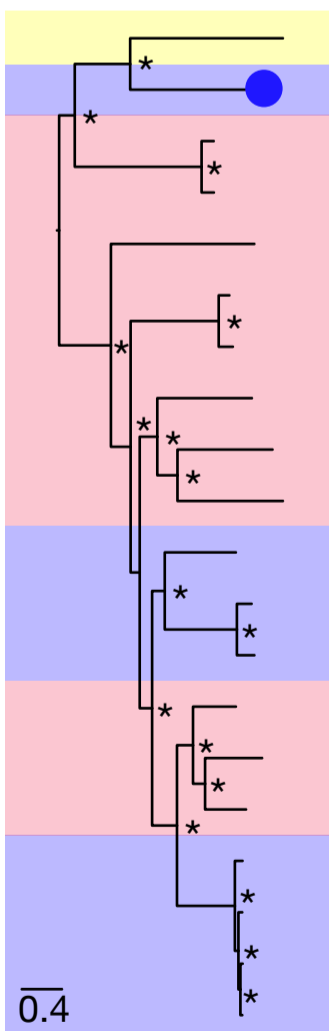

# Astroviridae

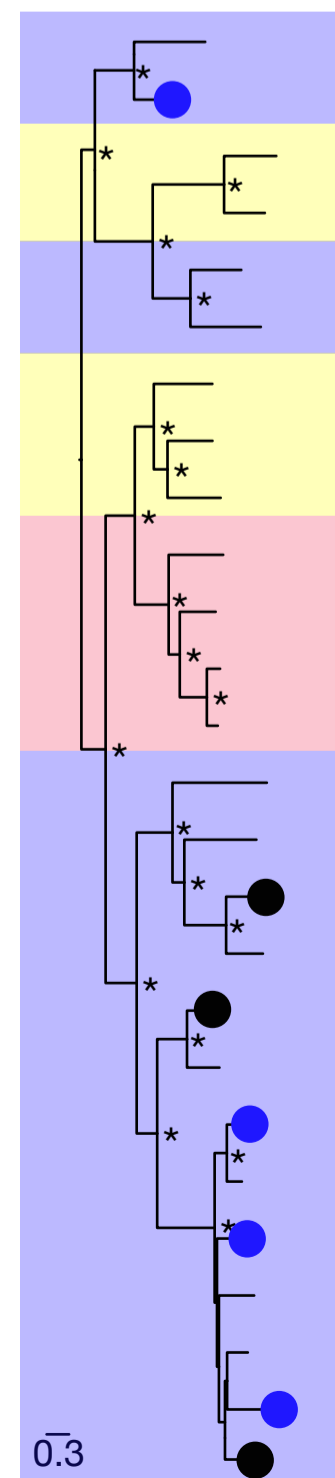

# Flaviviridae

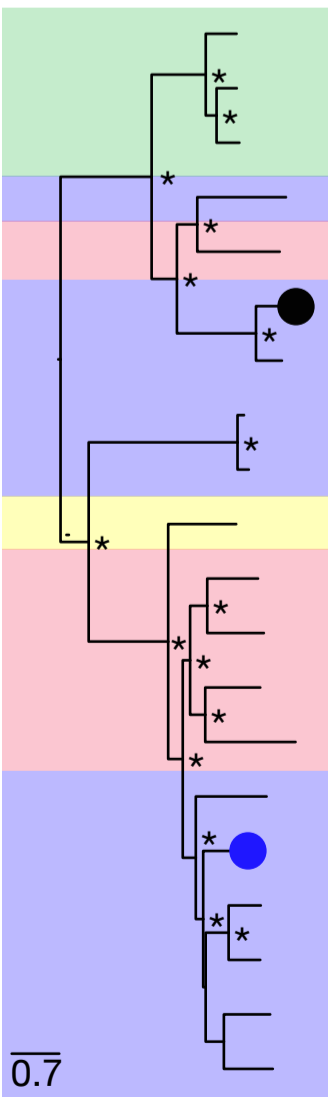

# Matonaviridae

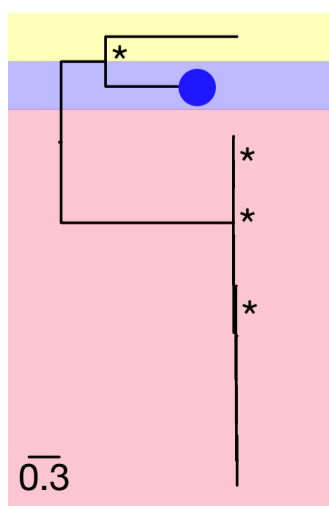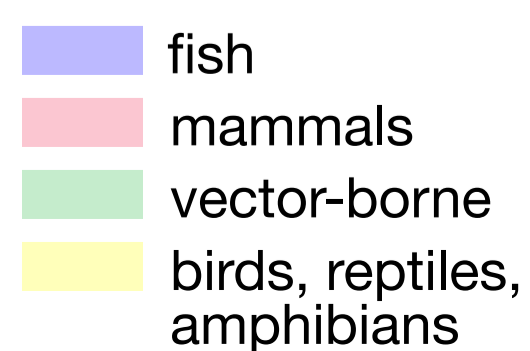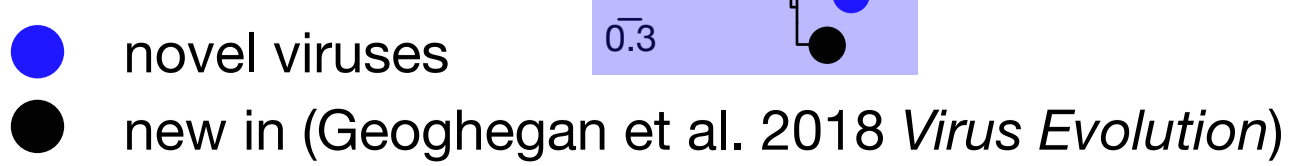

bioRxiv preprint doi: <https://doi.org/10.1101/2020.05.06.081505>; this version posted May 6, 2020. The copyright holder for this preprint (which was not certified by peer review) is the author/funder, who has granted bioRxiv a license to display the preprint in perpetuity. It is made available under aCC-BY-ND 4.0 International license.

A. Host order

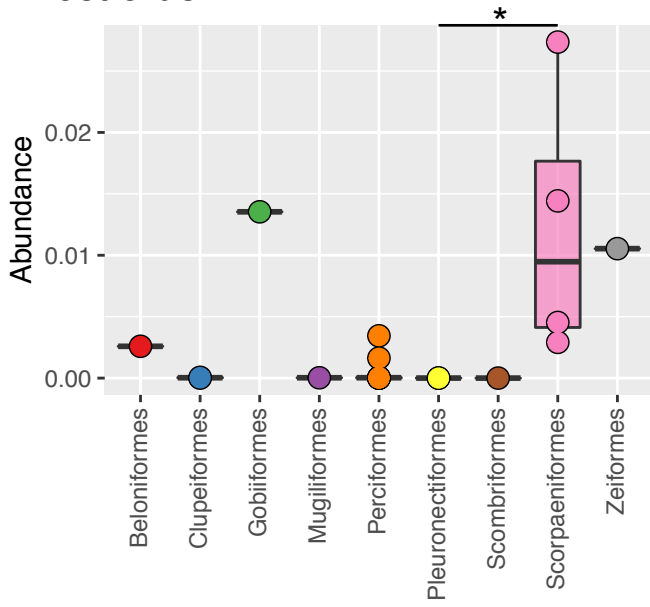

B. Mean preferred water temperature

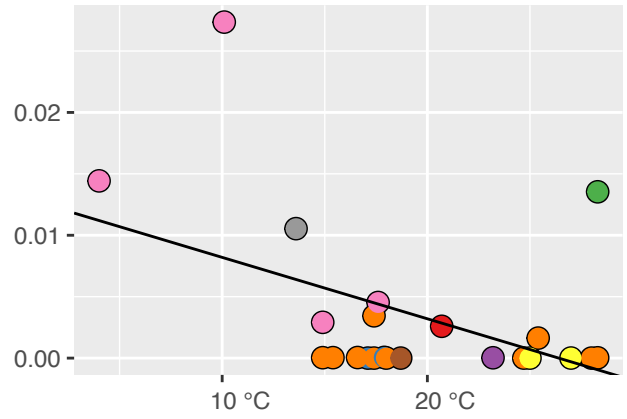

Viral Abundance

C. Host order

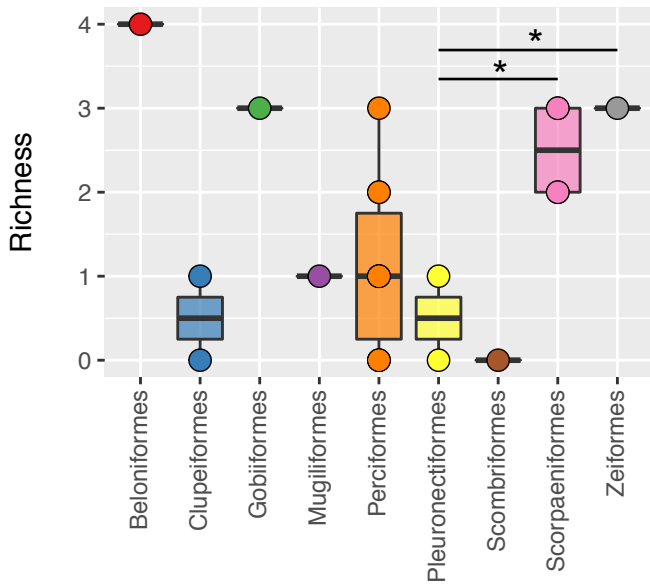

D. Habitat depth

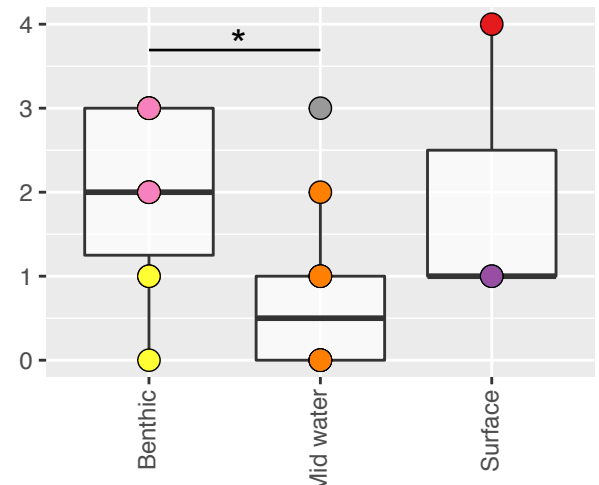

Alpha Diversity - Richness

E. Host order

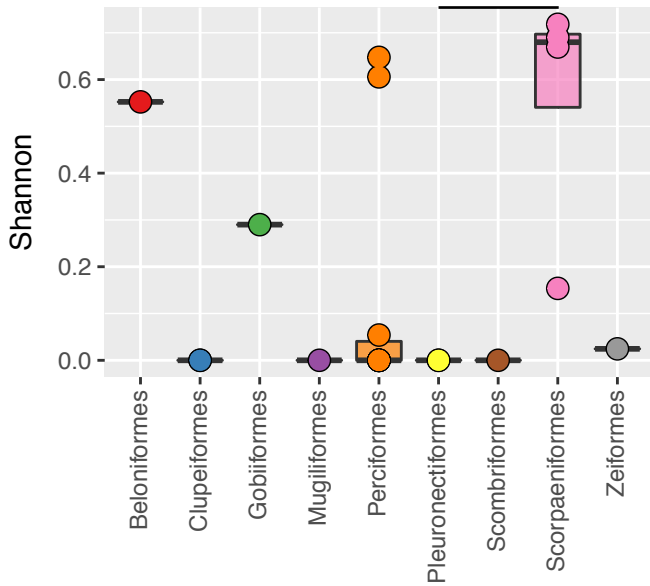

F. Host community diversity

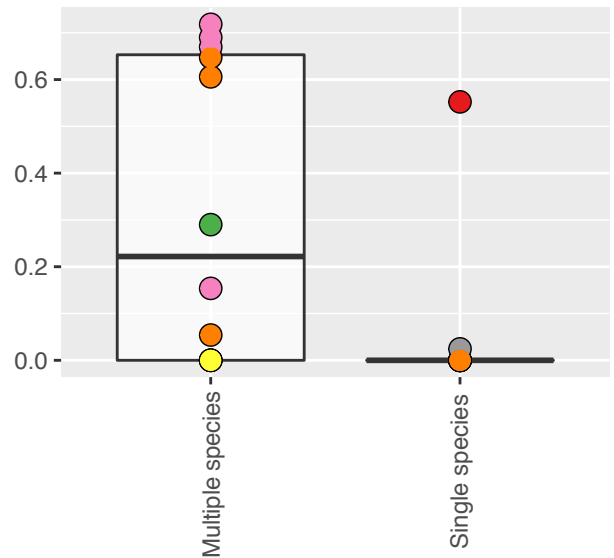

Alpha Diversity - Shannon Diversity

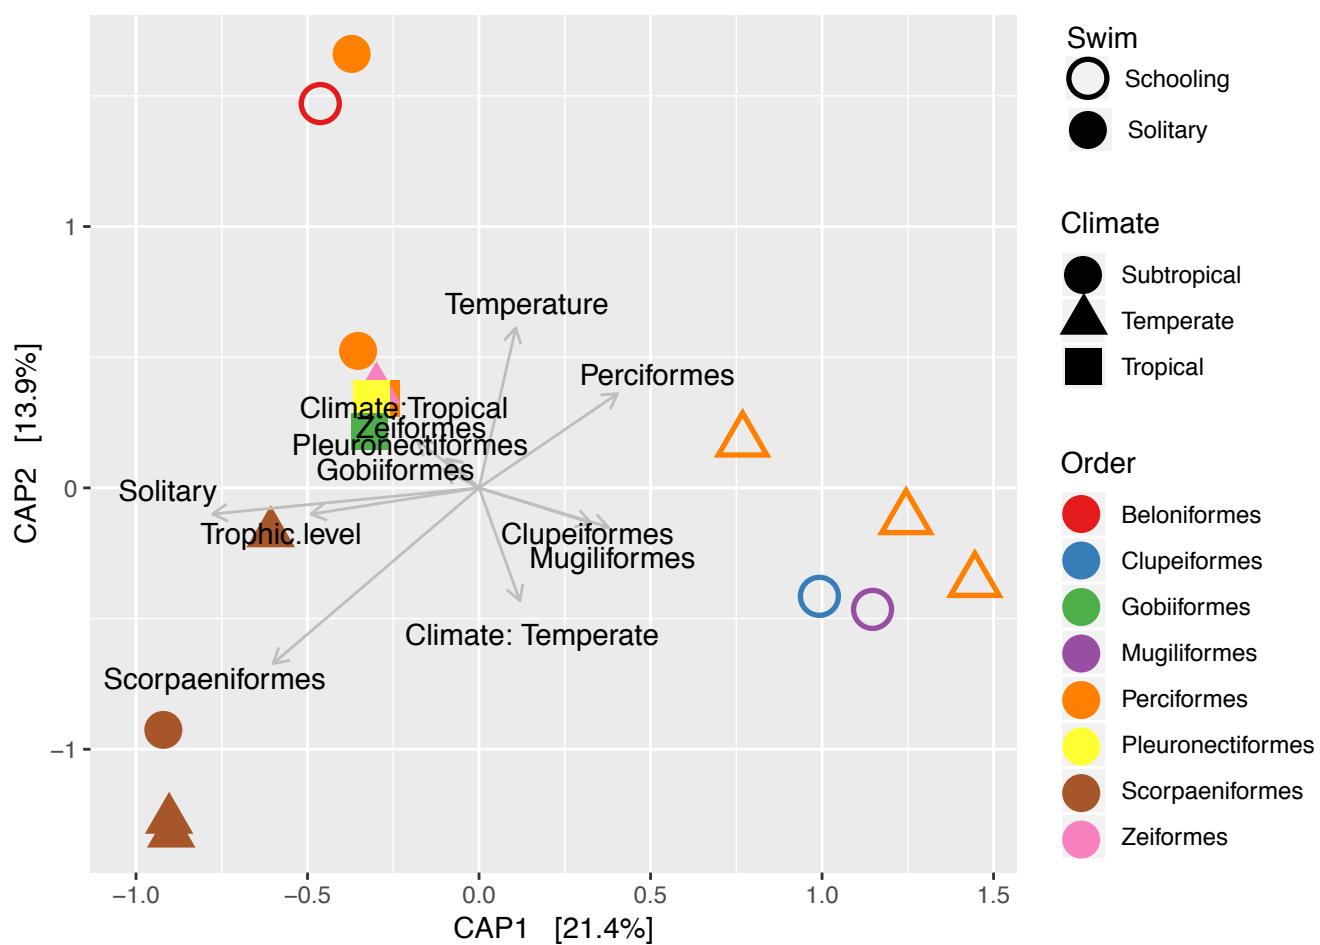

Source: https://www.biorxiv.org/content/10.1101/2020.05.06.081505v1.full.pdf
